# Supplementary material for: Do clinical trials affect anxiety, depression, and quality of life in the caregivers of patients with cancer?
Source: Frontiers journal article supplement (doi:10.3389/fpsyt.2022.950787), 2022-11-23
Supplement: Data_Sheet_3.PDF [file Data_Sheet_3.PDF]

Patient Name: \_\_\_\_\_

Date: \_\_\_\_\_

## Zung Self-Rating Depression Scale (SDS)

Instructions: For each item below, please place a check mark (✓) in the column which best describes how often you felt or behaved this way during the past several days.

| Place check mark (✓) in correct column.                    | A little of the time | Some of the time | Good part of the time | Most of the time |
|------------------------------------------------------------|----------------------|------------------|-----------------------|------------------|
| 1. I feel down-hearted and blue.                           |                      |                  |                       |                  |
| 2. Morning is when I feel the best.                        |                      |                  |                       |                  |
| 3. I have crying spells or feel like it.                   |                      |                  |                       |                  |
| 4. I have trouble sleeping at night.                       |                      |                  |                       |                  |
| 5. I eat as much as I used to.                             |                      |                  |                       |                  |
| 6. I still enjoy sex.                                      |                      |                  |                       |                  |
| 7. I notice that I am losing weight.                       |                      |                  |                       |                  |
| 8. I have trouble with constipation.                       |                      |                  |                       |                  |
| 9. My heart beats faster than usual.                       |                      |                  |                       |                  |
| 10. I get tired for no reason.                             |                      |                  |                       |                  |
| 11. My mind is as clear as it used to be.                  |                      |                  |                       |                  |
| 12. I find it easy to do the things I used to.             |                      |                  |                       |                  |
| 13. I am restless and can't keep still.                    |                      |                  |                       |                  |
| 14. I feel hopeful about the future.                       |                      |                  |                       |                  |
| 15. I am more irritable than usual.                        |                      |                  |                       |                  |
| 16. I find it easy to make decisions.                      |                      |                  |                       |                  |
| 17. I feel that I am useful and needed.                    |                      |                  |                       |                  |
| 18. My life is pretty full.                                |                      |                  |                       |                  |
| 19. I feel that others would be better off if I were dead. |                      |                  |                       |                  |
| 20. I still enjoy the things I used to do.                 |                      |                  |                       |                  |

## Scoring the Zung Self-Rating Depression Scale

In scoring the SDS, a value of 1, 2, 3 and 4 is assigned to a response depending upon whether the item is worded positively or negatively.

For items 1, 3, 4, 7, 8, 9, 10, 13, 15, 19 the scoring is:

- A little of the time = 1
- Some of the time = 2
- Good part of the time = 3
- Most of the time = 4

Items 2, 5, 6, 11, 12, 14, 16, 17, 18, 20 are reverse scored as follows:

- Most of the time = 1
- Good part of the time = 2
- Some of the time = 3
- A little of the time = 4

The SDS index is derived by dividing the sum of the values (raw scores) obtained on the 20 items by the maximum possible score of 80, and expressed as a decimal point. The table below converts raw scores into SDS index scores.

**A Table for the Conversion of Self-Rated Raw Scores to the SDS Index**

| Raw Score | SDS Index | Raw Score | SDS Index | Raw Score | SDS Index |
|-----------|-----------|-----------|-----------|-----------|-----------|
| 20        | 0.25      | 40        | 0.50      | 60        | 0.75      |
| 21        | 0.26      | 41        | 0.51      | 61        | 0.76      |
| 22        | 0.28      | 42        | 0.53      | 62        | 0.78      |
| 23        | 0.29      | 43        | 0.54      | 63        | 0.79      |
| 24        | 0.30      | 44        | 0.55      | 64        | 0.80      |
| 25        | 0.31      | 45        | 0.56      | 65        | 0.81      |
| 26        | 0.33      | 46        | 0.58      | 66        | 0.83      |
| 27        | 0.34      | 47        | 0.59      | 67        | 0.84      |
| 28        | 0.35      | 48        | 0.60      | 68        | 0.85      |
| 29        | 0.36      | 49        | 0.61      | 69        | 0.86      |
| 30        | 0.38      | 50        | 0.63      | 70        | 0.88      |
| 31        | 0.39      | 51        | 0.64      | 71        | 0.89      |
| 32        | 0.40      | 52        | 0.65      | 72        | 0.90      |
| 33        | 0.41      | 53        | 0.66      | 73        | 0.91      |
| 34        | 0.43      | 54        | 0.68      | 74        | 0.92      |
| 35        | 0.44      | 55        | 0.69      | 75        | 0.94      |
| 36        | 0.45      | 56        | 0.70      | 76        | 0.95      |
| 37        | 0.46      | 57        | 0.71      | 77        | 0.96      |
| 38        | 0.48      | 58        | 0.73      | 78        | 0.98      |
| 39        | 0.49      | 59        | 0.74      | 79        | 0.99      |
|           |           |           |           | 80        | 1.00      |
